# Supplementary material for: Two-dimensional borocarbonitrides for photocatalysis and photovoltaics
Source: Royal Society of Chemistry journal article supplement (doi:10.1039/d2tc05268g), 2023-01-01
Supplement: d2tc05268g1.pdf [file d2tc05268g1.pdf]

## Supplementary Information

### Two-Dimensional Borocarbonitrides for Photocatalysis and Photovoltaics

*Wei Zhang,<sup>\*,†,‡</sup> Changchun Chai,<sup>†</sup> Qingyang Fan,<sup>§</sup> Yintang Yang,<sup>†</sup> Minglei Sun,<sup>\*,||</sup> Maurizia*

*Palumbo,<sup>⊥</sup> and Udo Schwingenschlöggl<sup>\*,||</sup>*

<sup>†</sup>School of Microelectronics, Xidian University, Xi'an 710071, China

<sup>‡</sup>Beijing Institute of Astronautical Systems Engineering, Beijing 100076, China

<sup>§</sup>College of Information and Control Engineering, Xi'an University of Architecture and Technology, Xi'an 710055, China

<sup>||</sup>Physical Science and Engineering Division (PSE), King Abdullah University of Science and Technology (KAUST), Thuwal 23955-6900, Saudi Arabia

<sup>⊥</sup>Dipartimento di Fisica and INFN, Università di Roma "Tor Vergata", Via della Ricerca Scientifica 1, 00133 Roma, Italy

#### Corresponding Authors

\*W. Zhang (Email: wzhang-1993@stu.xidian.edu.cn)

\*M. Sun (Email: minglei.sun@kaust.edu.sa)

\*U. Schwingenschlöggl (Email: udo.schwingenschlogl@kaust.edu.sa)

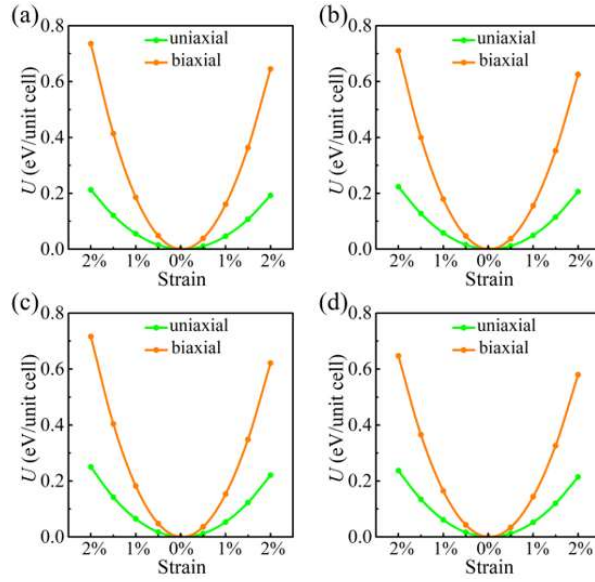

**Figure S1.** Elastic energies of (a)  $\alpha$ -BC<sub>2</sub>N, (b)  $\beta$ -BC<sub>2</sub>N, (c)  $\gamma$ -BC<sub>2</sub>N, and (d)  $\delta$ -BC<sub>2</sub>N under uniaxial and biaxial strain.

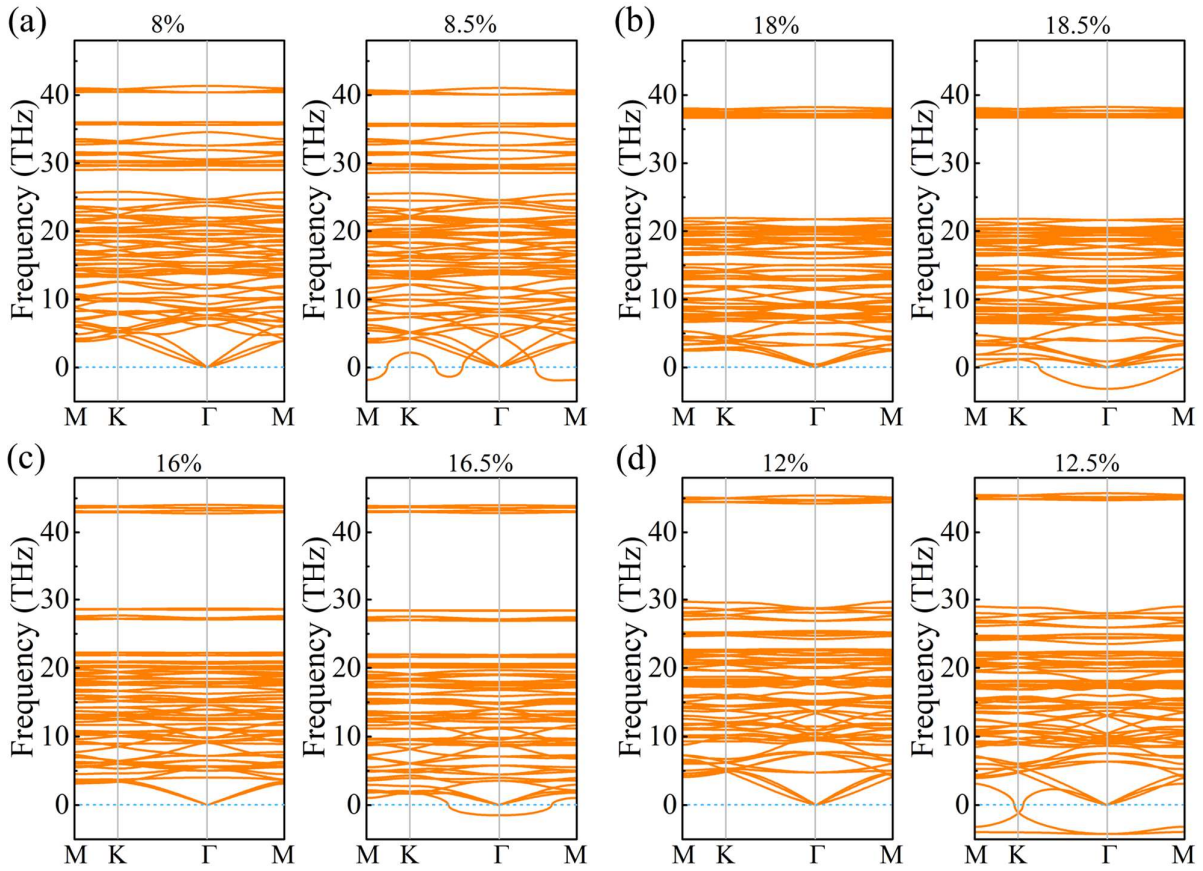

**Figure S2.** Phonon spectra of (a)  $\alpha$ -BC<sub>2</sub>N, (b)  $\beta$ -BC<sub>2</sub>N, (c)  $\gamma$ -BC<sub>2</sub>N, and (d)  $\delta$ -BC<sub>2</sub>N under extreme biaxial tensile strain.

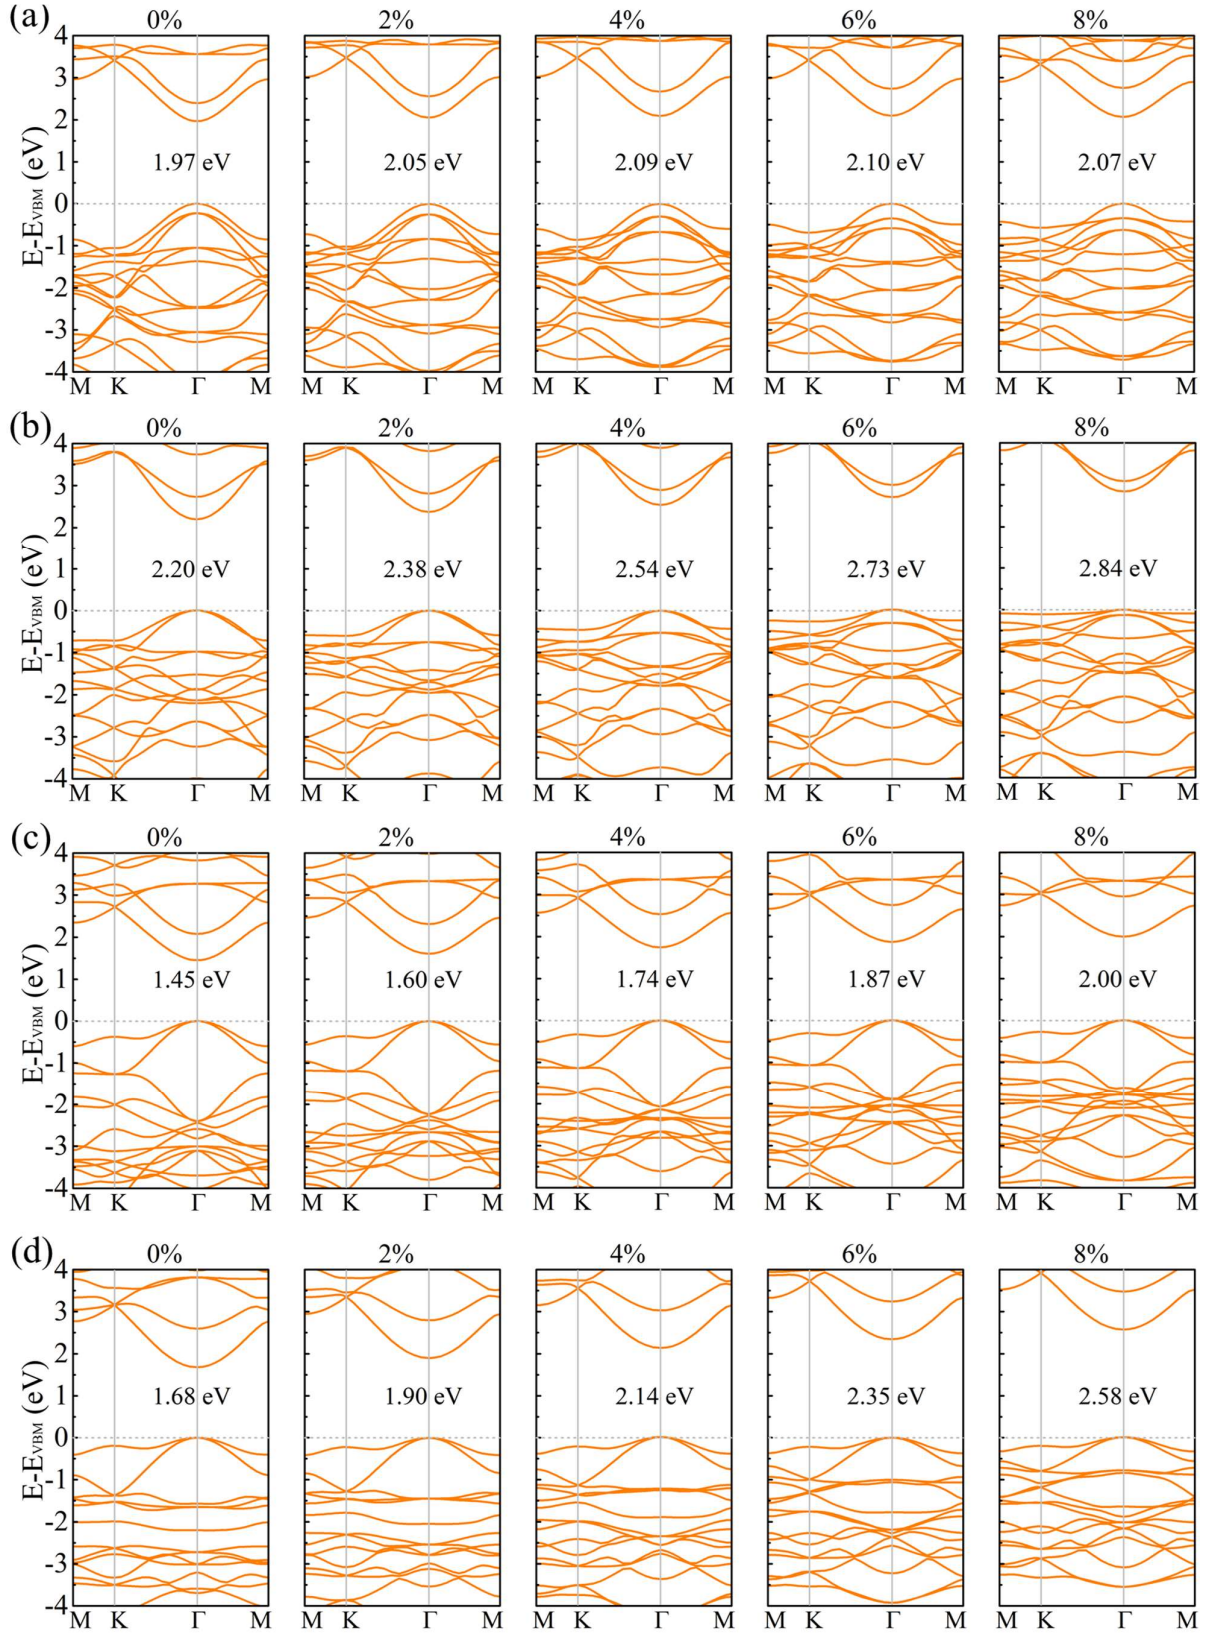

**Figure S3.** Electronic band structures of (a)  $\alpha$ -BC<sub>2</sub>N, (b)  $\beta$ -BC<sub>2</sub>N, (c)  $\gamma$ -BC<sub>2</sub>N, and (d)  $\delta$ -BC<sub>2</sub>N under 0%, 2%, 4%, 6%, and 8% biaxial tensile strain.

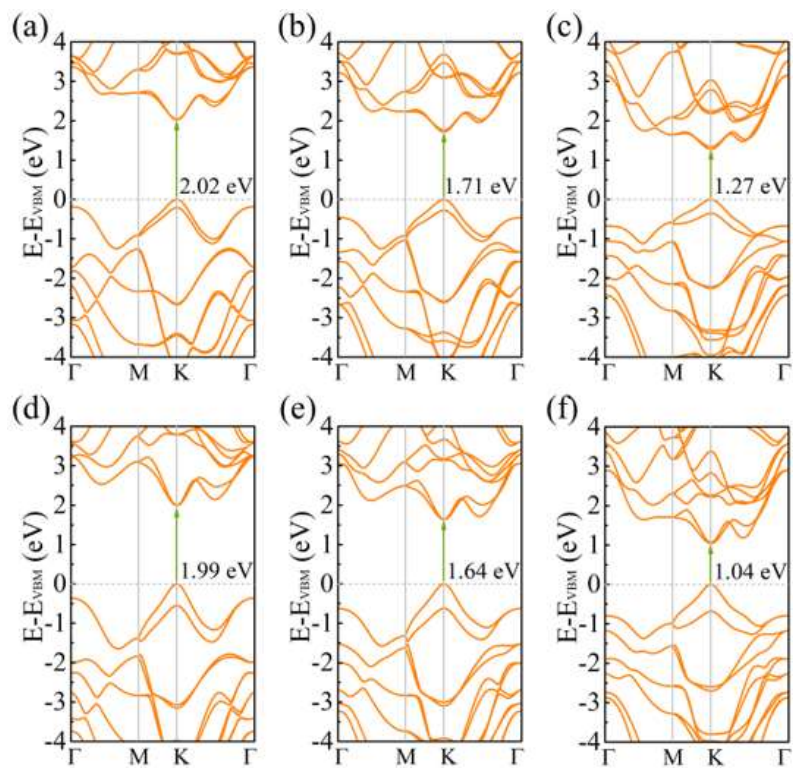

**Figure S4.** Electronic band structures of 2D (a) MoS<sub>2</sub>, (b) MoSe<sub>2</sub>, (c) MoTe<sub>2</sub>, (d) WS<sub>2</sub>, (e) WSe<sub>2</sub>, and (f) WTe<sub>2</sub> (HSE06+SOC).

POSCAR of  $\alpha$ -BC<sub>2</sub>N

$\alpha$ -BC<sub>2</sub>N

1.0

|              |             |              |
|--------------|-------------|--------------|
| 6.989478111  | 0.000000000 | 0.000000000  |
| -3.494739055 | 6.053065603 | 0.000000000  |
| 0.000000000  | 0.000000000 | 25.000000000 |

N    B    C

6    6    12

Direct

|             |             |             |
|-------------|-------------|-------------|
| 0.200451610 | 0.400903014 | 0.536225548 |
| 0.599097028 | 0.799548620 | 0.536225548 |
| 0.200451389 | 0.799548384 | 0.536225548 |
| 0.799548487 | 0.599096975 | 0.536225548 |
| 0.400902987 | 0.200451409 | 0.536225548 |
| 0.799548569 | 0.200451566 | 0.536225548 |
| 0.202360298 | 0.404720152 | 0.594618912 |
| 0.595279768 | 0.797640189 | 0.594618912 |
| 0.202359792 | 0.797639716 | 0.594618912 |
| 0.797639782 | 0.595279837 | 0.594618912 |
| 0.404720178 | 0.202359840 | 0.594618912 |
| 0.797640263 | 0.202360293 | 0.594618912 |
| 0.000000000 | 0.400363831 | 0.517391968 |
| 0.599636196 | 0.599636276 | 0.517391968 |
| 0.400363747 | 0.000000000 | 0.517391968 |
| 0.000000000 | 0.599636197 | 0.517391968 |
| 0.400363852 | 0.400363752 | 0.517391968 |
| 0.599636253 | 0.000000000 | 0.517391968 |
| 0.000000000 | 0.402411932 | 0.618688507 |
| 0.597588110 | 0.597588609 | 0.618688507 |
| 0.402411434 | 0.000000000 | 0.618688507 |
| 0.000000000 | 0.597588018 | 0.618688507 |
| 0.402411993 | 0.402411459 | 0.618688507 |
| 0.597588566 | 0.000000000 | 0.618688507 |

POSCAR of  $\beta$ -BC<sub>2</sub>N

$\beta$ -BC<sub>2</sub>N

1.0

|              |             |              |
|--------------|-------------|--------------|
| 7.054887694  | 0.000000000 | 0.000000000  |
| -3.527443846 | 6.109711964 | 0.000000000  |
| 0.000000000  | 0.000000000 | 25.000000000 |

C    N    B

12    6    6

Direct

|             |             |             |
|-------------|-------------|-------------|
| 0.018200077 | 0.412200738 | 0.449806955 |
| 0.981799937 | 0.587799289 | 0.550193044 |
| 0.587799259 | 0.605999385 | 0.449806955 |
| 0.412200723 | 0.394000682 | 0.550193044 |
| 0.394000697 | 0.981800010 | 0.449806955 |
| 0.605999337 | 0.018200059 | 0.550193044 |
| 0.412200870 | 0.018200141 | 0.550193042 |
| 0.587799130 | 0.981799928 | 0.449806957 |
| 0.605999319 | 0.587799140 | 0.550193042 |
| 0.394000746 | 0.412200887 | 0.449806957 |
| 0.981799893 | 0.394000749 | 0.550193042 |
| 0.018200140 | 0.605999318 | 0.449806957 |
| 0.202661353 | 0.405322497 | 0.473711820 |
| 0.797338627 | 0.594677530 | 0.526288141 |
| 0.594677547 | 0.797338858 | 0.473711820 |
| 0.405322490 | 0.202661151 | 0.526288141 |
| 0.202661158 | 0.797338662 | 0.473711820 |
| 0.797338828 | 0.202661346 | 0.526288141 |
| 0.799289065 | 0.598578247 | 0.468711812 |
| 0.200710982 | 0.401421781 | 0.531288187 |
| 0.401421766 | 0.200710790 | 0.468711812 |
| 0.598578204 | 0.799289219 | 0.531288187 |
| 0.799289251 | 0.200710990 | 0.468711812 |
| 0.200710806 | 0.799289057 | 0.531288187 |

POSCAR of  $\gamma$ -BC<sub>2</sub>N

$\gamma$ -BC<sub>2</sub>N

1.0

|              |             |              |
|--------------|-------------|--------------|
| 7.144219796  | 0.000000000 | 0.000000000  |
| -3.572109898 | 6.187075833 | 0.000000000  |
| 0.000000000  | 0.000000000 | 25.000000000 |

C    N    B

12    6    6

Direct

|              |              |              |
|--------------|--------------|--------------|
| 0.1897268517 | 0.4030883008 | 0.4728334678 |
| 0.5969117101 | 0.7866385628 | 0.4728334678 |
| 0.2133614361 | 0.8102731302 | 0.4728334678 |
| 0.1897268517 | 0.4030883008 | 0.5271664941 |
| 0.5969117101 | 0.7866385628 | 0.5271664941 |
| 0.2133614361 | 0.8102731302 | 0.5271664941 |
| 0.4030882778 | 0.1897268477 | 0.5271664941 |
| 0.7866385758 | 0.5969117161 | 0.5271664941 |
| 0.8102731122 | 0.2133614341 | 0.5271664941 |
| 0.4030882778 | 0.1897268477 | 0.4728334678 |
| 0.7866385758 | 0.5969117161 | 0.4728334678 |
| 0.8102731122 | 0.2133614341 | 0.4728334678 |
| 0.0000000000 | 0.3974533515 | 0.4494715094 |
| 0.6025466714 | 0.6025466654 | 0.4494715094 |
| 0.3974533225 | 0.0000000000 | 0.4494715094 |
| 0.0000000000 | 0.3974533515 | 0.5505284905 |
| 0.6025466714 | 0.6025466654 | 0.5505284905 |
| 0.3974533225 | 0.0000000000 | 0.5505284905 |
| 1.0000000000 | 0.5990671852 | 0.4525630865 |
| 0.4009328377 | 0.4009328307 | 0.4525630865 |
| 0.5990671892 | 0.0000000000 | 0.4525630865 |
| 1.0000000000 | 0.5990671852 | 0.5474368754 |
| 0.4009328377 | 0.4009328307 | 0.5474368754 |
| 0.5990671892 | 0.0000000000 | 0.5474368754 |

POSCAR of  $\delta$ -BC<sub>2</sub>N

$\delta$ -BC<sub>2</sub>N

1.0

|              |             |              |
|--------------|-------------|--------------|
| 7.132013922  | 0.000000000 | 0.000000000  |
| -3.566006960 | 6.176505236 | 0.000000000  |
| 0.000000000  | 0.000000000 | 25.000000000 |

C    B    N

12    6    6

Direct

|             |             |             |
|-------------|-------------|-------------|
| 0.207170098 | 0.402836743 | 0.472834329 |
| 0.792829874 | 0.597163235 | 0.527165670 |
| 0.597163215 | 0.804333364 | 0.472834329 |
| 0.402836717 | 0.195666634 | 0.527165670 |
| 0.195666632 | 0.792829850 | 0.472834329 |
| 0.804333354 | 0.207170090 | 0.527165670 |
| 0.597163202 | 0.792829850 | 0.527165670 |
| 0.402836734 | 0.207170090 | 0.472834329 |
| 0.195666645 | 0.402836743 | 0.527165670 |
| 0.804333360 | 0.597163235 | 0.472834329 |
| 0.207170098 | 0.804333364 | 0.527165670 |
| 0.792829883 | 0.195666634 | 0.472834329 |
| 1.000000000 | 0.406384919 | 0.451175467 |
| 1.000000000 | 0.593615060 | 0.548824532 |
| 0.593615083 | 0.593615060 | 0.451175467 |
| 0.406384922 | 0.406384919 | 0.548824532 |
| 0.406384926 | 0.000000000 | 0.451175467 |
| 0.593615107 | 0.000000000 | 0.548824532 |
| 1.000000000 | 0.608820702 | 0.450691717 |
| 1.000000000 | 0.391179277 | 0.549308282 |
| 0.391179290 | 0.391179277 | 0.450691717 |
| 0.608820715 | 0.608820702 | 0.549308282 |
| 0.608820729 | 0.000000000 | 0.450691717 |
| 0.391179304 | 0.000000000 | 0.549308282 |
